# Supplementary material
Source: publisher site journal article supplement (https://www.dovepress.com/get_supplementary_file.php?f=473525.docx)
Supplement: Supplementary file 1 [file get_supplementary_file.php]

Supplementary Material

# Supplementary Table S1: The information of 90 *S. warneri* of different host

| Strain | Source | BioSample | | BioProject |
| --- | --- | --- | --- | --- |
| GCA_003041335.1 | bos | | SAMN06173213 | PRJNA342349 |
| GCA_003042745.1 | bos | | SAMN06173210 | PRJNA342349 |
| GCA_003043285.1 | bos | | SAMN06173218 | PRJNA342349 |
| GCA_003041395.1 | bos | | SAMN06173208 | PRJNA342349 |
| GCA_003043215.1 | bos | | SAMN06173215 | PRJNA342349 |
| GCA_003579165.1 | bos | | SAMN06173223 | PRJNA342349 |
| GCA_003041575.1 | bos | | SAMN06173220 | PRJNA342349 |
| GCA_003041375.1 | bos | | SAMN06173214 | PRJNA342349 |
| GCA_003041355.1 | bos | | SAMN06173212 | PRJNA342349 |
| GCA_003043195.1 | bos | | SAMN06173224 | PRJNA342349 |
| GCA_003579215.1 | bos | | SAMN06173222 | PRJNA342349 |
| GCA_003043235.1 | bos | | SAMN06173211 | PRJNA342349 |
| GCA_003042935.1 | bos | | SAMN06173217 | PRJNA342349 |
| GCA_003042955.1 | bos | | SAMN06173206 | PRJNA342349 |
| GCA_003578955.1 | bos | | SAMN06173216 | PRJNA342349 |
| GCA_003578945.1 | bos | | SAMN06173219 | PRJNA342349 |
| GCA_003043255.1 | bos | | SAMN06173207 | PRJNA342349 |
| GCA_003579205.1 | bos | | SAMN06173221 | PRJNA342349 |
| GCA_003042755.1 | bos | | SAMN06173209 | PRJNA342349 |
| GCA_900636255.1 | environment | | SAMEA3505359 | PRJEB6403 |
| GCA_900458715.1 | environment | | SAMEA3539701 | PRJEB6403 |
| GCA_015273425.1 | human | | SAMN15665292 | PRJNA649052 |
| GCA_000736475.1 | human | | SAMN02937305 | PRJNA255947 |
| GCA_015274175.1 | human | | SAMN15665256 | PRJNA649052 |
| GCA_003850145.1 | human | | SAMN07671985 | PRJNA407975 |
| GCA_003344065.1 | human | | SAMN09269293 | PRJNA473233 |
| GCA_019714115.1 | human | | SAMN19669667 | PRJNA738164 |
| GCA_003850105.1 | human | | SAMN07671984 | PRJNA407975 |
| GCA_007665805.1 | human | | SAMN11792734 | PRJNA543692 |
| GCA_003857215.1 | human | | SAMN08931115 | PRJNA450155 |
| GCA_017167635.1 | human | | SAMN17570232 | PRJNA690512 |
| GCA_018612995.1 | human | | SAMN18299026 | PRJNA291433 |
| GCA_015273445.1 | human | | SAMN15665293 | PRJNA649052 |
| GCA_015273475.1 | human | | SAMN15665291 | PRJNA649052 |
| GCA_007667785.1 | human | | SAMN11792614 | PRJNA543692 |
| GCA_004329015.1 | human | | SAMN10735324 | PRJNA514867 |
| GCA_015274065.1 | human | | SAMN15665260 | PRJNA649052 |
| GCA_015548525.1 | human | | SAMN15532389 | PRJNA637878 |
| GCA_007666005.1 | human | | SAMN11792724 | PRJNA543692 |
| GCA_007672305.1 | human | | SAMN11792595 | PRJNA543692 |
| GCA_015274105.1 | human | | SAMN15665259 | PRJNA649052 |
| GCA_007666485.1 | human | | SAMN11792693 | PRJNA543692 |
| GCA_007681915.1 | human | | SAMN11792297 | PRJNA543692 |
| GCA_003438095.1 | human | | SAMN09736853 | PRJNA482748 |
| GCA_902385495.1 | human | | SAMEA5851805 | PRJEB33885 |
| GCA_003857195.1 | human | | SAMN08931113 | PRJNA450155 |
| GCA_007666685.1 | human | | SAMN11792680 | PRJNA543692 |
| GCA_003571725.1 | human | | SAMN09989479 | PRJNA489795 |
| GCA_001071965.1 | human | | SAMN03197443 | PRJNA267549 |
| GCA_001074135.1 | human | | SAMN03197943 | PRJNA267549 |
| GCA_000712925.1 | human | | SAMN02666777 | PRJNA235868 |
| GCA_000712915.1 | human | | SAMN02666775 | PRJNA235867 |
| GCA_007668085.1 | human | | SAMN11792596 | PRJNA543692 |
| GCA_000175175.1 | human | | SAMN00002361 | PRJNA34083 |
| GCA_000321085.1 | human | | SAMEA2272129 | PRJEA53353 |
| GCA_000211215.2 | human | | SAMN00116865 | PRJNA53759 |
| GCA_007814275.1 | human | | SAMN09714427 | PRJNA482667 |
| GCA_000332735.1 | human | | SAMN02604131 | PRJNA167492 |
| GCA_003285125.1 | human | | SAMN09476204 | PRJNA477688 |
| GCA_018373605.1 | human | | SAMN17801498 | PRJNA698986 |
| GCA_018401035.1 | human | | SAMN19005981 | PRJNA721826 |
| GCA_900636385.1 | human | | SAMEA3539706 | PRJEB6403 |
| GCA_014495745.1 | human | | SAMN15946583 | PRJNA660332 |
| GCA_013137955.1 | human | | SAMN10970963 | PRJNA523316 |
| GCA_003691405.1 | human | | SAMN10250190 | PRJNA497162 |
| GCA_900636265.1 | human | | SAMEA3505360 | PRJEB6403 |
| GCA_013267715.1 | human | | SAMN11056469 | PRJNA231221 |
| GCA_002901765.1 | human | | SAMN06177168 | PRJNA339206 |
| GCA_001471795.2 | human | | SAMN03996298 | PRJNA231221 |
| GCA_017898045.1 | human | | SAMN18632331 | PRJNA720085 |
| GCA_004125365.1 | human | | SAMN08103245 | PRJNA420010 |
| GCA_000981125.1 | human | | SAMN03352182 | PRJNA275682 |
| GCA_014267135.1 | human | | SAMN15815250 | PRJNA657113 |
| GCA_007666805.1 | human | | SAMN11792673 | PRJNA543692 |
| GCA_002026425.1 | human | | SAMN04296377 | PRJNA304162 |
| GCA_007666055.1 | human | | SAMN11792722 | PRJNA543692 |
| GCA_007666705.1 | human | | SAMN11792678 | PRJNA543692 |
| GCA_001196045.1 | human | | SAMEA1024731 | PRJEB2393 |
| GCA_017315555.1 | human | | SAMN17937444 | PRJNA702288 |
| GCA_001073945.1 | human | | SAMN03197895 | PRJNA267549 |
| GCA_910574905.1 | mouse | | SAMEA8801373 | PRJEB45232 |
| GCA_009911045.1 | mouse | | SAMN09901065 | PRJNA486904 |
| GCA_004570505.1 | mouse | | SAMN11126851 | PRJNA527079 |
| GCA_015235035.1 | mouse | | SAMN16540206 | PRJNA671681 |
| GCA_001876385.1 | rice | | SAMN04590062 | PRJNA316783 |
| GCA_001876395.1 | rice | | SAMN04590061 | PRJNA316783 |
| GCA_001477375.1 | rice | | SAMN03401353 | PRJNA278415 |
| GCA_001477415.1 | rice | | SAMN03401362 | PRJNA278198 |
| GCA_001476975.1 | rice | | SAMN03401355 | PRJNA278191 |
| GCA_007833855.1 | porcine | | SAMN10687116 | PRJNA512551 |
